# Supplementary material for: Adsorption of core-shell nanoparticles at liquid–liquid interfaces
Source: Royal Society of Chemistry journal article supplement (doi:10.1039/c1sm05407d), 2011-01-01
Supplement: c1sm05407d.pdf [file c1sm05407d.pdf]

# Adsorption of Core-Shell Nanoparticles at Liquid-Liquid Interfaces

## Electronic Supplementary Information

Lucio Isa,<sup>\*a</sup> Esther Amstad,<sup>a</sup> Konrad Schwenke,<sup>b</sup> Emanuela Del Gado,<sup>b</sup> Patrick Ilg,<sup>c</sup> Martin Kröger,<sup>c</sup> and Erik Reimhult<sup>a,d</sup>

### 1 Pendant drop tensiometry movie

isa-ESI-movie.avi shows a typical pendant drop tensiometry experiment. The shape of a drop of an aqueous NP suspension immersed in n-decane changes as a function of time as NPs adsorb at the interface and lower the effective interfacial tension. The movie corresponds to the  $c = 1 \times 10^{-6}$  mol for the PEG 10000 NPs with  $C = 2.1$  nm reported in Figure 1 of the main body of the paper.

### 2 Additional QCM-D data

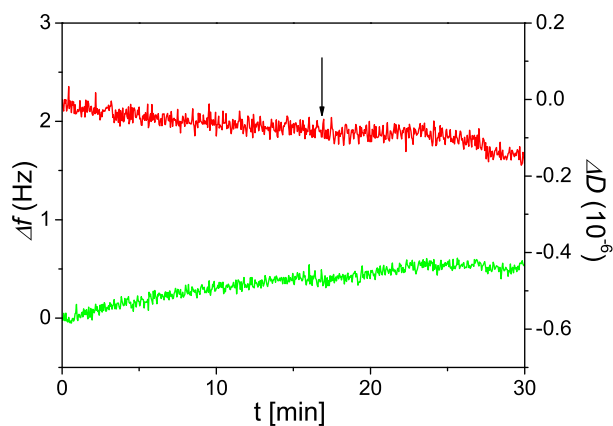

**Fig. 1** Frequency shifts  $\Delta f$  (green line) and dissipation  $\Delta D$  (red line) measured with QCM-D as a function of time upon exchanging water with n-decane on bare substrates. n-decane was pumped through the QCM-D chamber at a flow rate of  $50 \mu\text{L}/\text{min}$  at the time point highlighted by the arrow and no appreciable change is observed. The latter observation is confirmed by eight independent repetitions.

<sup>a</sup> Laboratory for Surface Science and Technology, Department of Materials, ETH Zurich, Wolfgang-Pauli-Strasse 10, 8093 Zurich, Switzerland. Fax: +41 (0)44 633 10 27; Tel: +41 44 633 63 76; E-mail: lucio.isa@mat.ethz.ch

<sup>b</sup> Microstructure and Rheology, Institute for Building Materials, Department of Civil, Geomatic and Environmental Engineering, ETH Zurich, Schafmattstrasse 6, 8093 Zurich, Switzerland

<sup>c</sup> Polymer Physics, Department of Materials, ETH Zurich, Wolfgang-Pauli-Str. 10, 8093 Zurich, Switzerland.

<sup>d</sup> Department of NanoBiotechnology, University of Natural Resources and Life Sciences (BOKU) Vienna, Muthgasse 11, 1190 Vienna, Austria.

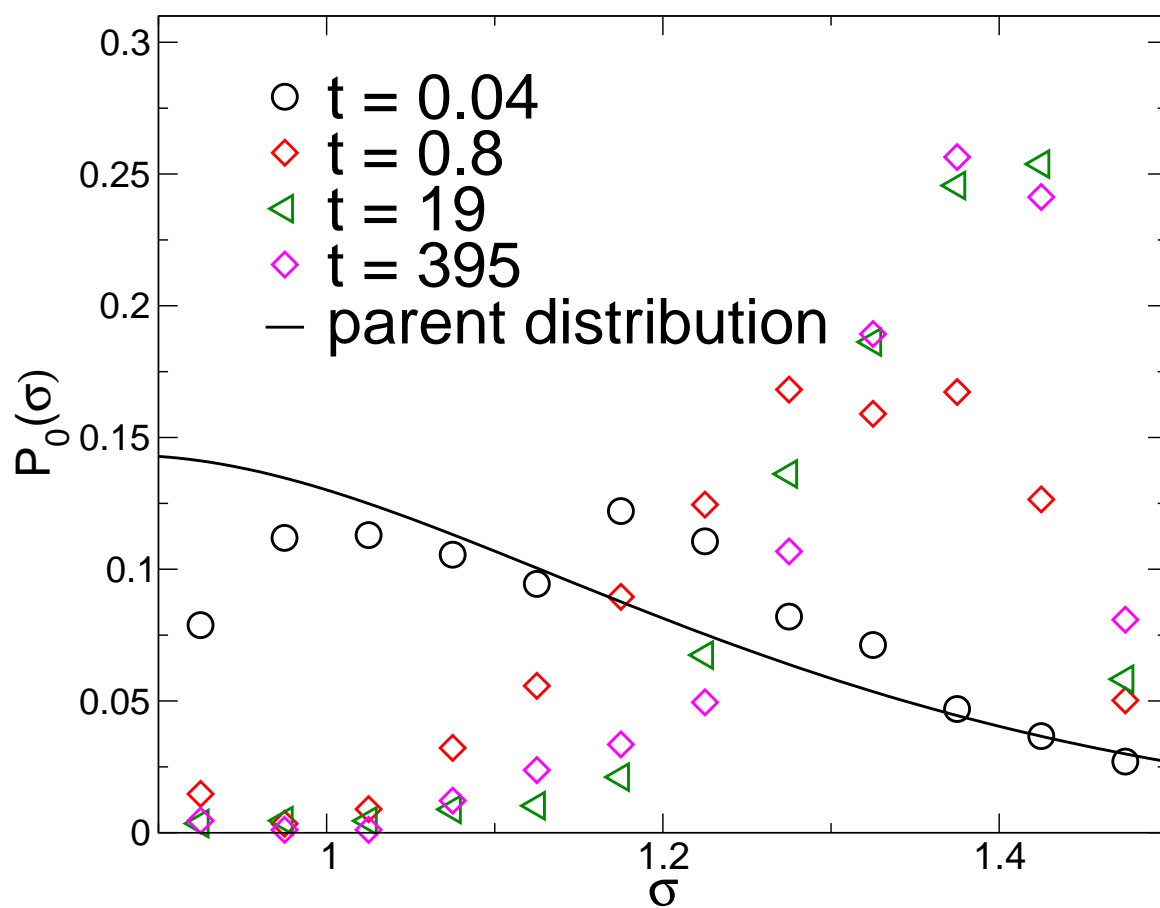

**Fig. 2** Particle size distribution for  $\Delta E_0 = 1k_B T$  at different times  $t$  in MD steps. The raw data from the simulations (symbols) are fitted by log-normal distributions (solid lines).

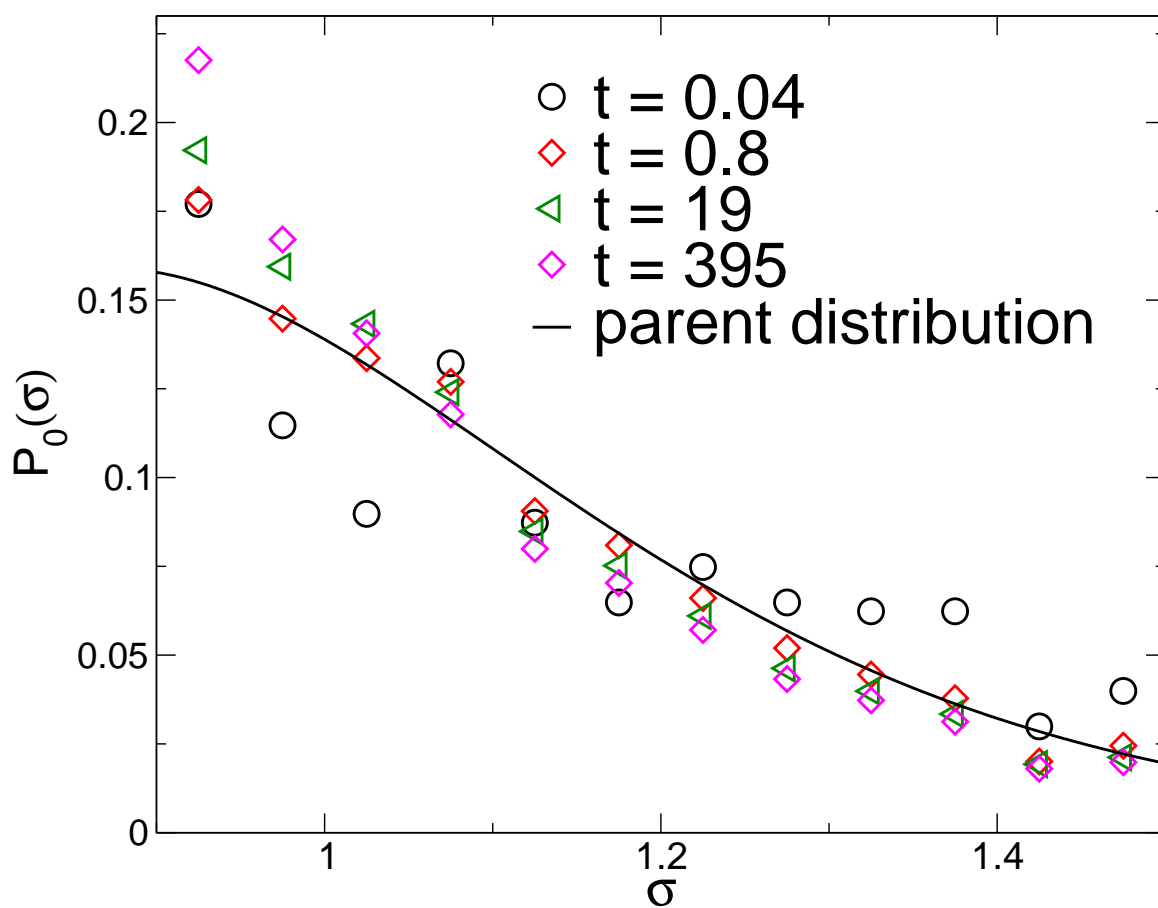

**Fig. 3** Particle size distribution for  $\Delta E_0 = 50k_B T$  at different times  $t$  in MD steps. The raw data from the simulations (symbols) are fitted by log-normal distributions (solid lines).
